# Supplementary material for: Exploration of tumor-suppressive microRNAs silenced by DNA hypermethylation in cervical cancer
Source: Virol J. 2013 Jun 3;10:175. doi: 10.1186/1743-422X-10-175 (PMC3674919; doi:10.1186/1743-422X-10-175)
Supplement: Additional file 1: Table S1 — Primers of real-time PCR. [file 1743-422X-10-175-S1.xls]

## Sheet: Sheet1
Table 1 Primers used for reverse transcription or polymerase chain reaction of microRNAs
Gene name	Primer sequence
Hsa-miR-432	GSP:5’GGGGTCTTGGAGTAGGTCATT3’
	R:5’ AGTGCGTGTCGTGGAGT3’
hsa-miR-1286	GSP:5’GGGGTGCAGGACCAAGATG3’
	R:5’ GCGTGTCGTGGAGTCGGC3’
hsa-miR-641	GSP:5’GGGGAAAGACATAGGATAGAGT3’
	R:5’CAGTGCGTGTCGTGGAG3’
hsa-mir-1290	GSP:5'GGGGACCTAAAAACCTA3'
	R:5’ CAGTGCGTGTCGTGGAGT3’
hsa-mir-1287	GSP:5'GGGGTGCTGGATCAGTGGTT3'
	R:5’ TGCGTGTCGTGGAGTCG3’
hsa-miR-95	GSP:5’ GGGGTTCAACGGGTATTTA3’
	R:5'CAGTGCGTGTCGTGGAGT3'
hsa-miR-625	GSP:5’ GGGGAGGGGGAAAGTTCTA3’
	R:5'TATCCAGTGCGTGTCGTG3'
hsa-let-7a	F:5'GGGGTGAGGTAGTAGGTTG3'
	R:5’TGCGTGTCGTGGAGTC3’
U6	F:5’GCTTCGGCAGCACATATACTAAAAT3’
	R:5’CGCTTCACGAATTTGCGTGTCAT3’
