# Supplementary material for: Exploration of tumor-suppressive microRNAs silenced by DNA hypermethylation in cervical cancer
Source: Virol J. 2013 Jun 3;10:175. doi: 10.1186/1743-422X-10-175 (PMC3674919; doi:10.1186/1743-422X-10-175)
Supplement: Additional file 4: Table S4 — The down-regulated microRNAs after 5-Aza treatment. [file 1743-422X-10-175-S4.xls]

## Sheet: Sheet1
Table4.The down regulated microRNAs after 5-Aza treatment
NAME	ID	C33A	NAME	ID	Caski	NAME	ID	Hela	NAME	ID	Siha
hsa-miR-32	11053	0.0016336	hsa-miR-32	11053	0.00934744	hsa-miRPlus-E1187	21670	0.0216926	hsa-miR-508-5p	42812	0.030176
hsa-miR-301a	13143	0.00333628	hsa-miR-20a	46513	0.0601275	hsa-miR-564	42944	0.0258632	hsa-miR-522	42483	0.0503501
hsa-miR-374a	27378	0.0056112	hsa-miR-362-3p	17893	0.0632643	hsa-miR-624	32095	0.026547	hsa-miR-602	42531	0.0598066
hsa-miR-20a	46513	0.00799806	hsa-miR-190	27536	0.0676576	hsa-miR-132*	17808	0.0387694	hsa-miR-874	42808	0.062962
hsa-miR-374b	14302	0.00833178	hsa-miR-18b	42644	0.0820607	hsa-miRPlus-E1150	46370	0.0619326	hsa-miR-554	42766	0.062984
hsa-miR-16	10967	0.00845097	hsa-miR-19a	10997	0.0870161	hsa-miR-425*	11108	0.0650039	hsa-miR-323-5p	42457	0.0678578
hsa-miR-19a	10997	0.0105792	hsa-miR-135b	10942	0.0871414	hsa-miR-455-3p	28950	0.0705857	hcmv-miR-US25-1*	42458	0.0705016
hsa-miR-18b	42644	0.0124085	hsa-miR-374a	27378	0.0877588	hsa-miR-1267	46633	0.0913982	hsa-miR-495	42676	0.0762975
hsa-miR-20b	42640	0.012903	hsa-miR-18a	42588	0.0941573	hsa-miRPlus-E1074	46575	0.10069	hsa-miR-612	27551	0.0783583
hsa-miR-18a	42588	0.0150711	hsa-miR-301a	13143	0.100219	hsa-miRPlus-E1127	46447	0.101354	hsa-miRPlus-F1141	46831	0.087994
hsa-miR-33a	42716	0.0151985	hsa-miR-374b	14302	0.100811	hsa-miR-510	11142	0.109262	hsa-miR-524-5p	46235	0.0976294
hsa-miR-15a	27720	0.0171467	hsa-miR-20b	42640	0.108522	hsa-miR-557	42760	0.110552	hsa-miR-557	42760	0.114672
hsa-miR-519a	42561	0.0181696	hsa-miR-98	11182	0.109129	hsa-miR-612	27551	0.127918	ebv-miR-BART13	27537	0.125247
hsa-miR-9	4040	0.0199411	hsa-miR-218	11018	0.109927	hsa-miR-551a	17272	0.135495	hsa-miR-1184	46258	0.125925
hsa-miR-15b	17280	0.0201042	hsa-miR-16	10967	0.110663	hsa-miRPlus-F1141	46831	0.136438	hsa-miR-518e*/hsa-miR-519a*/hsa-miR-519b-5p/hsa-miR-519c-5p/hsa-miR-522*/hsa-miR-523*	13137	0.135072
hsa-miR-15b	17280	0.0201042	hsa-miR-301b	17886	0.120032	hsa-miR-488	42704	0.143629	ebv-miR-BHRF1-2	42951	0.144322
hsa-miR-101	31026	0.0240787	hsa-miR-30e	28191	0.121747	hsa-miR-602	42531	0.145996	hsa-miR-520d-5p	46354	0.151945
hsa-miR-101	31026	0.0240787	hsa-miR-27a	46483	0.126585	hsa-miR-27b*	42823	0.156122	hcmv-miR-UL112	17508	0.153002
hsa-miR-1265	46737	0.0261144	hsa-miR-9	4040	0.13074	hsa-miR-1297	46944	0.158365	hsa-miR-654-5p	42843	0.169588
hsa-miR-140-5p	4700	0.0273559	hsa-miR-15a	27720	0.133893	hsa-miR-1297	46944	0.158365	hsa-miR-638	42832	0.177799
hsa-miR-218	11018	0.0279933	hsa-miR-17	42650	0.139992	hsa-miR-181d	42840	0.160234	hsa-miRPlus-E1187	21670	0.201517
hsa-miR-30e	28191	0.0281055	hsa-miR-101	31026	0.146888	hsa-miR-519a	42561	0.16403	hsa-miRPlus-E1014	46769	0.205407
hsa-miR-27a	46483	0.028946	hsa-miR-140-5p	4700	0.153463	hsa-miR-519a	42561	0.16403	hsa-miR-675	42761	0.211339
hsa-miRPlus-E1016	46466	0.030347	hsa-miR-135a	42839	0.154688	hsa-miR-323-3p	42957	0.1647	hsa-miR-1207-5p	46565	0.216915
hsa-miRPlus-E1016	46466	0.030347	hsa-miR-31*	46320	0.155972	hsa-miR-1184	46258	0.179081	hsa-miR-488	42704	0.221379
hsa-miRPlus-F1181	46329	0.0311025	hsa-miR-106a	42648	0.158609	hsa-miR-637	17354	0.186904	hsa-miRPlus-F1127	46815	0.229306
hsa-miRPlus-F1181	46329	0.0311025	hsa-let-7f	46435	0.159689	hsa-miRPlus-C1087	17892	0.205994	hsa-miRPlus-F1099	46498	0.241621
hsa-miR-17	42650	0.0311946	hsa-miR-7	29490	0.161636	hsa-miR-938	42776	0.21004	hsa-miRPlus-E1042	46877	0.242378
hsa-miR-222*	17918	0.0328009	hsa-miR-222*	17918	0.167771	hsa-miR-638	42832	0.212267	hsa-miRPlus-E1107	46238	0.252774
hsa-miR-222*	17918	0.0328009	hsa-miR-15b	17280	0.168714	hsa-miR-212	42627	0.213978	hsa-miRPlus-F1043	46252	0.274587
hsa-miR-29b	11040	0.0336614	hsa-miR-421	17474	0.173424	hsa-miR-509-3-5p	42589	0.215089	hsa-miR-1236	46624	0.306866
hsa-miR-363*	27544	0.0368404	hsa-miRPlus-A1087	17848	0.173429	hsa-miRPlus-E1192	46516	0.224799	hsa-miR-637	17354	0.306967
hsa-miR-363*	27544	0.0368404	hsa-miR-1265	46737	0.17497	hsa-miR-522	42483	0.23203	hsa-miRPlus-C1087	17892	0.31209
hsa-miR-106a	42648	0.0394917	hsa-miR-29b	11040	0.176543	hsa-miR-9*	29852	0.234144	hsa-miR-425*	11108	0.319456
hsa-miR-362-3p	17893	0.0399104	hsa-miRPlus-E1016	46466	0.17774	hsa-miRPlus-F1127	46815	0.251157	hsa-miR-425*	11108	0.319456
hsa-let-7d	46437	0.0435763	hsa-let-7d	46437	0.183276	hsa-miR-761	32608	0.252919	hsa-miR-132*	17808	0.322607
hsa-miR-130a	10138	0.0443299	hsa-miR-193a-3p	10986	0.193296	hsa-miR-761	32608	0.252919	hsa-miRPlus-F1088	46294	0.324779
hsa-miR-363	11077	0.0460505	hsa-miR-455-3p	28950	0.194487	hsa-miR-550*	17660	0.2562	hsa-miR-551a	17272	0.32587
hsa-miR-190	27536	0.0474832	hsa-miR-455-3p	28950	0.194487	hsa-miR-1204	46791	0.264164	hsa-miR-509-3-5p	42589	0.327095
hsa-miR-1201	46712	0.0487841	hsa-miR-363*	27544	0.195818	hsa-miR-508-5p	42812	0.280167	kshv-miR-K12-3	42795	0.329935
hsa-miRPlus-E1060	46394	0.0500582	hsa-miR-96	13147	0.200484	kshv-miR-K12-5	17578	0.283256	hsa-miR-125b-2*	42845	0.330685
hsa-miR-24-2*	42950	0.0508749	hsa-miR-33a	42716	0.205164	hsa-miR-1236	46624	0.284021	hsa-miR-583	17295	0.33704
hsa-miR-181d	42840	0.0523712	hsa-miR-194	10988	0.207786	hsa-miRPlus-E1029	46770	0.285803	kshv-miR-K12-5	17578	0.345458
hsa-miRPlus-E1100	46719	0.0525138	hsa-miRPlus-E1060	46394	0.209041	hcmv-miR-UL112	17508	0.286341	hsa-miRPlus-F1038	46505	0.35802
hsa-miR-1297	46944	0.0539582	hsa-miR-324-5p	42477	0.212894	hsa-miR-455-5p	13179	0.288225	hsa-miRPlus-E1074	46575	0.361526
hsa-miR-1297	46944	0.0539582	hsa-miRPlus-E1088	46512	0.213424	hsa-miR-1271	46627	0.288225	hsa-miR-326	42693	0.393871
hsa-let-7g	46438	0.0557568	hsa-miR-130a	10138	0.220533	hsa-miR-455-5p	13179	0.288225	hsa-miR-510	11142	0.394619
hsa-miR-196a	10990	0.0559546	hsa-miRPlus-E1047	46475	0.224148	ebv-miR-BHRF1-3	17646	0.290042	hsa-miR-107	10923	0.395099
hsa-miR-196a	10990	0.0559546	hsa-miRPlus-E1202	46648	0.234099	hsa-miRPlus-E1081	46886	0.302109	hsa-miR-130b	10936	0.407109
hsa-miR-96	13147	0.0577911	hsa-miR-203	11004	0.235857	hsa-miR-138	13140	0.30744	hsa-miR-130b	10936	0.407109
hsa-miR-128	33902	0.059354	hsa-miR-203	11004	0.235857	hsa-miR-187*	42775	0.310432	hsa-miR-611	42901	0.42534
hsa-miR-182	10975	0.0620767	hsa-miR-660	17338	0.237155	hsa-miR-520d-5p	46354	0.343568	hsa-miR-203	11004	0.431486
hsa-miRPlus-F1104	46503	0.0621987	hsa-miR-103-2*	42720	0.238091	hsa-miR-877	30033	0.346147	hsa-miR-203	11004	0.431486
hsa-miRPlus-F1104	46503	0.0621987	hsa-miRPlus-E1159	46431	0.239427	hsa-miRPlus-E1146	46662	0.352536	hsa-miRPlus-F1248	46728	0.457224
hsa-miR-301b	17886	0.0632708	hsa-miRPlus-E1159	46431	0.239427	hsa-miR-625	17573	0.367365	hsa-miRPlus-F1029	46873	0.469074
hsa-miR-301b	17886	0.0632708	hsa-miR-148a	10955	0.242432	hsa-miR-625	17573	0.367365	hsa-miR-625	17573	0.475536
hsa-miR-126*	33596	0.0659489	hsa-miR-30e*	11224	0.266185	hsa-miR-874	42808	0.377117	hsa-miR-625	17573	0.475536
hsa-miR-21	5740	0.0689881	hsa-miR-196a	10990	0.26899	hsa-miR-518e*/hsa-miR-519a*/hsa-miR-519b-5p/hsa-miR-519c-5p/hsa-miR-522*/hsa-miR-523*	13137	0.377856	hsa-miR-877	30033	0.476847
hsa-miR-1259	46923	0.071386	hsa-miR-10a	13485	0.275219	hsa-miR-675	42761	0.385648	hsa-miRPlus-E1127	46447	0.489399
hsa-miR-1259	46923	0.071386	hsa-miR-1207-5p	46565	0.281814	hsa-miR-654-5p	42843	0.405415	hsa-miRPlus-E1127	46447	0.489399
hsa-let-7f	46435	0.0720886	hsa-miR-27b	46469	0.287852	hsa-miRPlus-E1201	46397	0.410092	hsa-miRPlus-E1215	46887	0.498484
hsa-let-7f	46435	0.0720886	hsa-miR-365	11078	0.289	hsa-miRPlus-E1107	46238	0.41175
hsa-miR-19b	10998	0.0737421	hsa-miRPlus-E1100	46719	0.290143	hsa-miRPlus-F1029	46873	0.420123
hsa-miR-19b	10998	0.0737421	hsa-miR-1259	46923	0.291124	hsa-miRPlus-F1099	46498	0.431055
hsa-miR-187*	42775	0.0777255	hsa-let-7g	46438	0.295926	hsa-miRPlus-E1159	46431	0.433569
hsa-miR-151-5p	11260	0.078453	hsa-miR-424	42965	0.296533	hsa-miRPlus-E1159	46431	0.433569
hsa-miR-28-5p	42831	0.0788366	hsa-miR-128	33902	0.3023	hsa-miRPlus-F1088	46294	0.4392
hsa-miR-98	11182	0.0789437	hsa-miR-138	13140	0.302951	hsa-miR-326	42693	0.440815
hsa-miR-27b*	42823	0.0789791	hsa-miRPlus-E1065	46488	0.306843	hsa-miRPlus-E1185	46720	0.450567
hsa-miR-27b*	42823	0.0789791	hsa-miR-103	10919	0.307076	hsa-let-7i	9938	0.458534
hsa-miR-194	10988	0.0801279	hsa-miR-363	11077	0.307323	hsa-miR-125b-2*	42845	0.465569
hsa-miR-194	10988	0.0801279	hsa-miR-100	19581	0.310156	hsa-miR-340*	42738	0.477847
hsa-miR-31*	46320	0.0834666	hsa-miRPlus-E1103	45852	0.311031	hsa-miR-340*	42738	0.477847
hsa-miR-31*	46320	0.0834666	hsa-miR-24-1*	42575	0.3249	ebv-miR-BART13	27537	0.478032
hsa-miR-624	32095	0.0856067	hsa-miR-125b	30787	0.326083	kshv-miR-K12-3	42795	0.478062
hsa-miR-192	17732	0.0864379	hsa-miR-589	42542	0.327947	ebv-miR-BHRF1-2	42951	0.483933
hsa-miR-206	11007	0.0882009	hsa-miR-19b	10998	0.330397	hsa-miRPlus-E1042	46877	0.486585
hsa-miR-103-2*	42720	0.0973776	hsa-miR-195	13148	0.331868	hsa-miRPlus-F1043	46252	0.492265
hsa-miR-27b	46469	0.0989233	hsa-miR-34c-5p	11074	0.333504	hsa-miR-583	17295	0.493433
hsa-miRPlus-E1215	46887	0.101214	hsa-miR-188-5p	42620	0.337409	hsa-miRPlus-F1038	46505	0.4941
hsa-miR-30b	17565	0.10367	hsa-miR-17*	19588	0.3385	hsa-miR-611	42901	0.499074
hsa-miRPlus-E1202	46648	0.104119	hsa-miRPlus-F1195	46882	0.34333	hcmv-miR-US25-1*	42458	0.499268
hsa-miRPlus-E1088	46512	0.10471	hsa-miR-582-3p	29328	0.344439
hsa-miR-340*	42738	0.104742	hsa-miR-24-2*	42950	0.344439
hsa-miR-340*	42738	0.104742	hsa-miR-564	42944	0.344439
hsa-miR-340*	42738	0.104742	hsa-miR-564	42944	0.344439
hsa-miR-26b	46930	0.105687	hsa-miR-554	42766	0.344439
hsa-miR-26b	46930	0.105687	hsa-miR-1280	46698	0.348337
hsa-miR-106b	19582	0.107628	hsa-miR-149	42810	0.349738
hsa-miR-542-3p	14272	0.108963	hsa-miR-331-3p	42887	0.350886
hsa-miR-99a*	17852	0.111826	hsa-miR-524-5p	46235	0.355203
hsa-miR-195	13148	0.115126	hsa-miR-151-5p	11260	0.355383
hsa-let-7a	17748	0.115504	hsa-miR-455-5p	13179	0.362332
hsa-miR-10b	10925	0.118598	hsa-miR-455-5p	13179	0.362332
ebv-miR-BHRF1-3	17646	0.125772	hsa-miR-668	42727	0.363667
ebv-miR-BHRF1-3	17646	0.125772	hsa-miR-28-5p	42831	0.365706
hsa-miR-24	17506	0.12717	hsa-miR-21	5740	0.366073
hsa-miR-24	17506	0.12717	hsa-miR-519a	42561	0.368031
hsa-miRPlus-F1195	46882	0.127691	hsa-miR-519a	42561	0.368031
hsa-miR-23b	11027	0.128591	hsa-miRPlus-E1012	46649	0.37115
hsa-miR-135b	10942	0.12872	hsa-miR-1308	46739	0.371584
hsa-let-7i	9938	0.128764	hsa-miR-23b	11027	0.375378
hsa-miRPlus-E1078	46255	0.130942	hsa-miR-26b	46930	0.377843
hsa-miR-221*	42475	0.131126	hsa-miR-451	42866	0.383803
hsa-miR-9*	29852	0.132005	hsa-miR-106b	19582	0.387335
ebv-miR-BART18-3p	42466	0.137748	hsa-miRPlus-F1181	46329	0.387947
hsa-miR-193a-3p	10986	0.139346	hsa-miR-10b	10925	0.390364
hsa-miR-193a-3p	10986	0.139346	hsa-miRPlus-E1252	46540	0.392485
hsa-miR-1267	46633	0.140575	hsa-miR-500*	46406	0.399993
hsa-miR-188-5p	42620	0.142786	hsa-miR-29c	11041	0.401557
hsa-miR-455-3p	28950	0.151185	hsa-miR-30c	42923	0.407888
hsa-miR-455-3p	28950	0.151185	hsa-miRPlus-E1258	46538	0.409266
hsa-miRPlus-A1087	17848	0.151682	hsa-miR-181b	10972	0.414417
hsa-miRPlus-A1087	17848	0.151682	hsa-miR-720	42751	0.416258
hsa-miR-93	30687	0.152849	hsa-miRPlus-F1001	46756	0.418912
hsa-miR-93	30687	0.152849	hsa-let-7a	17748	0.428078
hsa-miR-30e*	11224	0.154918	hsa-miRPlus-E1082	46352	0.428088
hsa-miR-421	17474	0.158043	hsa-miR-93	30687	0.432826
hsa-miR-421	17474	0.158043	hsa-miR-18a*	13178	0.433672
hsa-miRPlus-E1012	46649	0.158502	hsa-miR-1201	46712	0.434145
hsa-miRPlus-E1012	46649	0.158502	hsa-miR-148b	19585	0.446721
hsa-miRPlus-F1058	46417	0.15926	hsa-miR-29a*	42920	0.450067
hsa-miRPlus-E1082	46352	0.160577	hsa-miR-192	17732	0.450902
hsa-miRPlus-E1103	45852	0.162789	hsa-miR-186*	42614	0.451092
hsa-miRPlus-E1103	45852	0.162789	hsa-miR-761	32608	0.454659
hsa-miR-135a	42839	0.166933	hsa-miR-761	32608	0.454659
hsa-miRPlus-E1192	46516	0.171374	hsa-miR-495	42676	0.454659
hsa-miRPlus-E1192	46516	0.171374	hsa-miR-140-3p	42630	0.455875
hsa-miR-29c	11041	0.173156	hsa-miR-625	17573	0.4587
hsa-miR-10a	13485	0.173822	hsa-miR-625	17573	0.4587
hsa-miRPlus-E1139	46325	0.176421	hsa-miR-1297	46944	0.459252
hsa-miR-582-3p	29328	0.178062	hsa-miR-1297	46944	0.459252
hsa-miR-668	42727	0.178748	hsa-miR-24	17506	0.460033
hsa-miR-324-5p	42477	0.185709	hsa-miR-26a	11030	0.461388
hsa-miR-324-5p	42477	0.185709	hsa-miRPlus-F1104	46503	0.461913
hsa-miR-331-3p	42887	0.189948	hsa-miR-412	42764	0.463938
hsa-miR-1271	46627	0.197092	hsa-miRPlus-E1078	46255	0.467851
hsa-miR-1271	46627	0.197092	hsa-miR-30b	17565	0.46893
hsa-miRPlus-E1047	46475	0.208336	hsa-miR-29a	11039	0.46939
hsa-miRPlus-E1049	46318	0.212611	hsa-miR-126*	33596	0.469689
hsa-miR-564	42944	0.214454	hsa-miR-340*	42738	0.476915
hsa-miR-564	42944	0.214454	hsa-miR-340*	42738	0.476915
hsa-miR-100	19581	0.217862	hsa-miR-206	11007	0.47738
hsa-miR-17*	19588	0.218324	hsa-miR-20a*	42663	0.480095
hsa-miR-660	17338	0.224251	hsa-miRPlus-A1065	42780	0.483461
hsa-miR-140-3p	42630	0.226467	hsa-miR-107	10923	0.492751
hsa-miR-26a	11030	0.229232	hsa-miRPlus-F1042	46519	0.496934
hsa-miR-1204	46791	0.231392	hsa-miR-130b	10936	0.497192
hsa-miRPlus-E1252	46540	0.231502	hsa-miR-130b	10936	0.497192
hsa-miR-20a*	42663	0.238525	hsa-miR-135b*	42615	0.497723
hsa-miR-20a*	42663	0.238525	hsa-miR-99a*	17852	0.498842
hsa-miRPlus-E1191	46494	0.245603
hsa-miR-135b*	42615	0.247308
hsa-miRPlus-E1014	46769	0.249287
hsa-miRPlus-E1150	46370	0.254374
hsa-miR-22*	42532	0.257416
hsa-miR-509-5p	42972	0.258776
hsa-miR-149	42810	0.267608
hsa-miR-149	42810	0.267608
hsa-miR-720	42751	0.26964
hsa-miR-720	42751	0.26964
hsa-miR-451	42866	0.269791
hsa-miR-30c	42923	0.275469
hsa-miR-148a	10955	0.276303
hsa-miR-323-3p	42957	0.286959
hsa-miR-589	42542	0.287513
hsa-miR-589	42542	0.287513
hsa-miRPlus-E1258	46538	0.28919
hsa-miR-18a*	13178	0.290025
hsa-miRPlus-E1065	46488	0.291006
hsa-miR-532-5p	17624	0.291905
hsa-miR-361-5p	14301	0.296634
hsa-miR-148b	19585	0.296985
hsa-miR-7	29490	0.306869
hsa-miR-7	29490	0.306869
hsa-miR-191	10985	0.308393
hsa-miRPlus-E1201	46397	0.312389
hsa-miRPlus-E1029	46770	0.315127
hsa-miR-29a	11039	0.322465
hsa-miRPlus-F1248	46728	0.323749
hsa-miR-455-5p	13179	0.323749
hsa-miR-455-5p	13179	0.323749
hsa-miR-103	10919	0.325933
hsa-miR-34c-5p	11074	0.331278
hsa-miR-938	42776	0.338016
hsa-miR-20b*	17882	0.34641
hsa-miR-29a*	42920	0.348946
hsa-miR-424	42965	0.35046
hsa-miR-1280	46698	0.353027
hsa-miRPlus-E1127	46447	0.353054
hsa-miRPlus-E1127	46447	0.353054
hsa-miRPlus-F1001	46756	0.35787
hsa-miRPlus-F1001	46756	0.35787
hsa-miRPlus-E1133	46383	0.361623
hsa-miR-186*	42614	0.363829
hsa-miR-500*	46406	0.372311
hsa-miR-1285	46286	0.373195
hsa-miR-24-1*	42575	0.393689
hsa-miRPlus-E1081	46886	0.398259
hsa-miRPlus-E1081	46886	0.398259
hsa-miR-125b	30787	0.409397
hsa-miR-125b	30787	0.409397
hsa-miRPlus-A1065	42780	0.413473
hsa-miR-25	42682	0.415877
hsa-miR-130b	10936	0.417947
hsa-miR-130b	10936	0.417947
hsa-miR-212	42627	0.433592
hsa-miRPlus-F1042	46519	0.433824
hsa-miRPlus-F1042	46519	0.433824
hsa-miR-425*	11108	0.43535
hsa-miR-425*	11108	0.43535
hsa-miRPlus-E1185	46720	0.436472
hsa-miR-761	32608	0.438089
hsa-miR-761	32608	0.438089
hsa-miR-203	11004	0.445155
hsa-miR-203	11004	0.445155
hsa-miR-181b	10972	0.445155
hsa-miR-181b	10972	0.445155
hsa-miRPlus-E1043	46857	0.453918
hsa-let-7c	19004	0.470107
hsa-miRPlus-E1159	46431	0.472977
hsa-miRPlus-E1159	46431	0.472977
hsa-miRPlus-E1038	46537	0.478764
hsa-miR-323-5p	42457	0.479398
hsa-miR-550*	17660	0.48025
hsa-miR-1308	46739	0.485624
hsa-miR-365	11078	0.486337
hsa-miR-365	11078	0.486337
hsa-miRPlus-E1146	46662	0.494683
hsa-miR-412	42764	0.49729
